# Supplementary material for: Differential roles of STAT1 and STAT2 in the sensitivity of JAK2V617F- vs. BCR-ABL-positive cells to interferon alpha
Source: PubMed Central journal article supplement (PMC6444528; doi:10.1186/s13045-019-0722-9), 2019-04-02

Figure S10

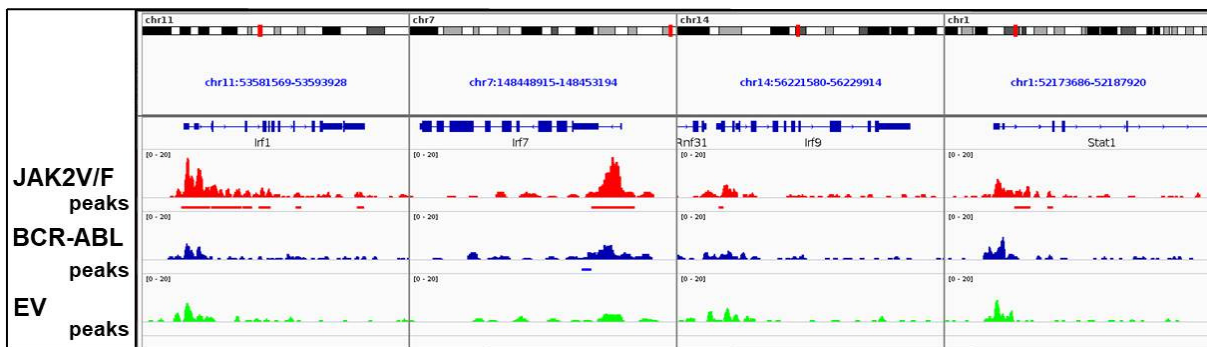

Supplement: 13045_2019_722_MOESM11_ESM.pdf [file 13045_2019_722_MOESM11_ESM.pdf]
